# Supplementary material for: Influence of N-Glycosylation on Virus–Host Interactions in Halorubrum lacusprofundi
Source: MDPI journal article supplement (doi:10.3390/v15071469), 2023-06-28
Supplement: s1 [file s1]

## **Supplementary Material**

### **Table of contents**

#### **Supplementary Figures**

Supplementary Figure S1: Glycoprotein staining of cells and infectious agents.

Supplementary Figure S2: The  $\Delta aglB$  mutant shows decreased adaptability to changes in sodium chloride concentrations, as compared to the parent strain.

Supplementary Figure S3: Viral and plasmid genome copy numbers in cell pellets for the three infectious agents.

#### **Supplementary Tables**

Supplementary Table S1: Primers (PCR and qPCR) used in this study.

## Supplementary Figures

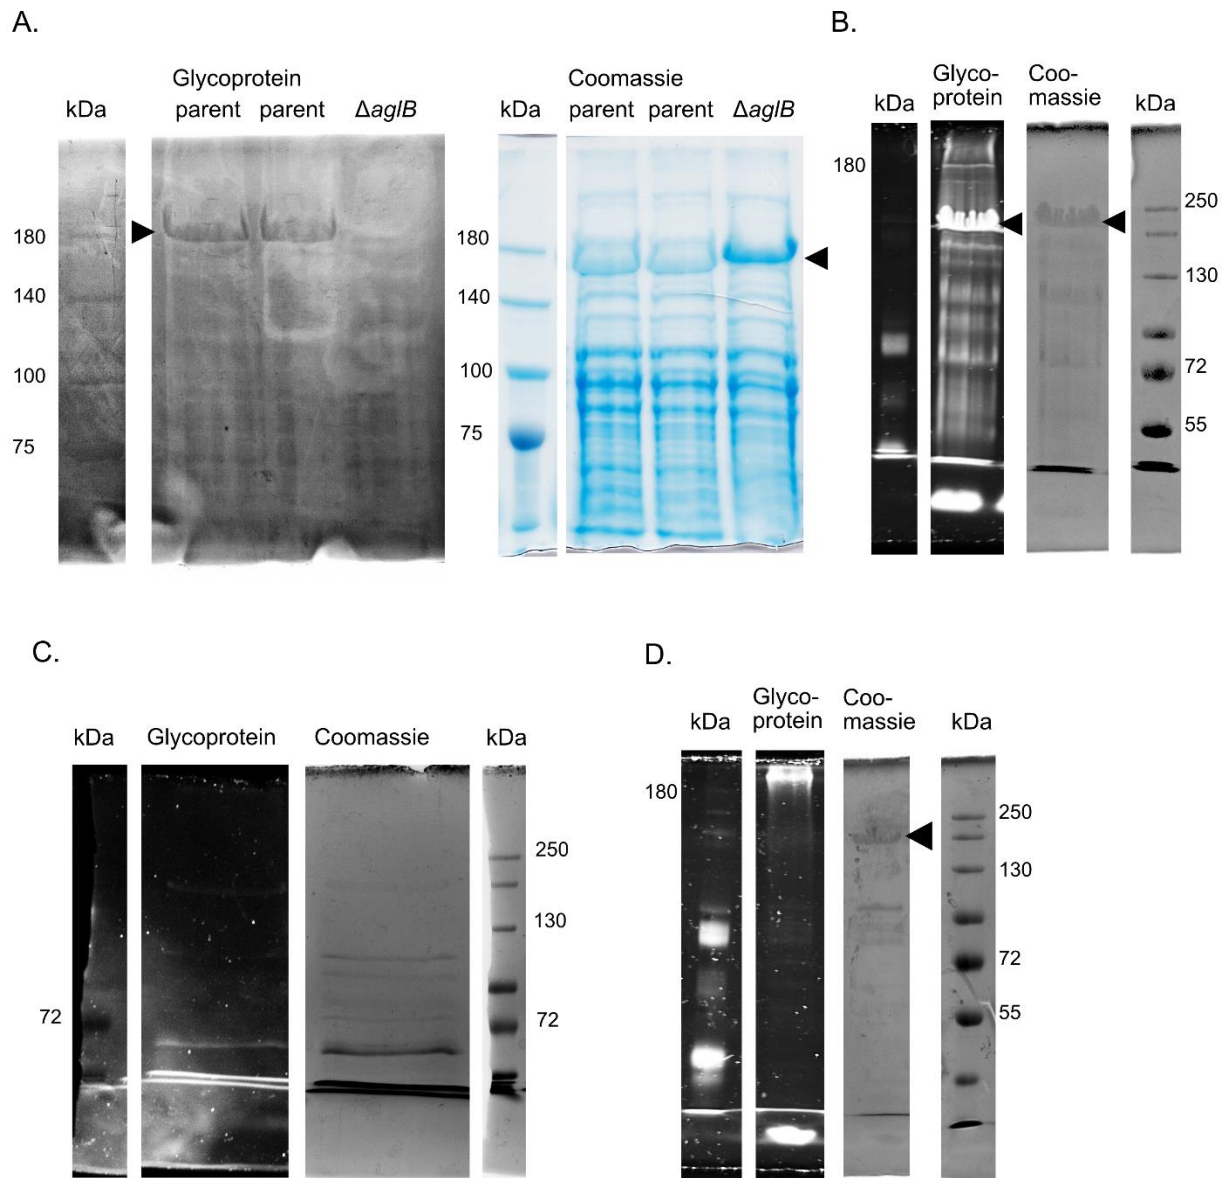

### Supplementary Figure S1: Glycoprotein staining of cells and infectious agents.

Cell preparations from parent and  $\Delta aglB$  strains (**A**) were separated via SDS-PAGE (8% Acrylamide) and stained with either periodic acid-Schiff staining or Coomassie dye to visualize all proteins. ExcelBand 3-color Regular Range Protein Marker (Bio Lab) was added as a size standard (kDa), the position of the S-layer glycoprotein is marked with black arrows in this and all following graphs. Purified preparations of HFPV-1 (**B**), HRTV-DL1 (**C**) and PVs (**D**), produced in their native host organisms, were separated via SDS-PAGE (8% Acrylamide). Glycoproteins were visualized with the Pro-Q Emerald 300 Glycoprotein Kit (Invitrogen) after which gels were stained with Coomassie Dye to visualize all proteins. CandyCane Glycoprotein Standard (Invitrogen, left) and broad Range Color Prestained Protein Standard (NEB, right) were added as size markers (kDa).

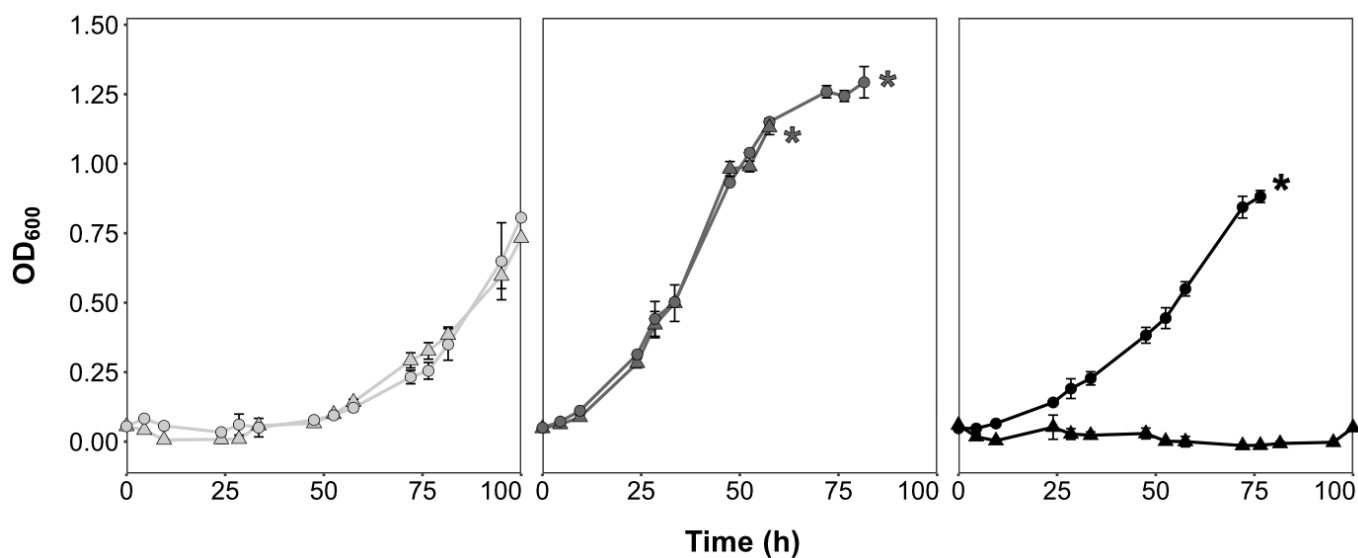

**Supplementary Figure S2: The  $\Delta aglB$  mutant shows decreased adaptability to changes in sodium chloride concentrations, as compared to the parent strain.**

The growth of the parent ( $\Delta pyrE2$ , circles) and  $\Delta aglB$  (triangles) strains was monitored in media containing NaCl concentrations of 100 g/l = 1.7 M (light grey), 180 g/l = 3.1 M (dark grey) or 250 g/l = 4.3 M (black). The growth data for 180 g/l was generated in a separate experiment to the data shown in Figure 1C, simultaneously with the 100 g/l and 250 g/l cultures. Each point represents the average of three biological replicates  $\pm$  standard deviation of the mean. Asterisks indicate when cultures went into biofilm and OD<sub>600</sub> could no longer be accurately measured.

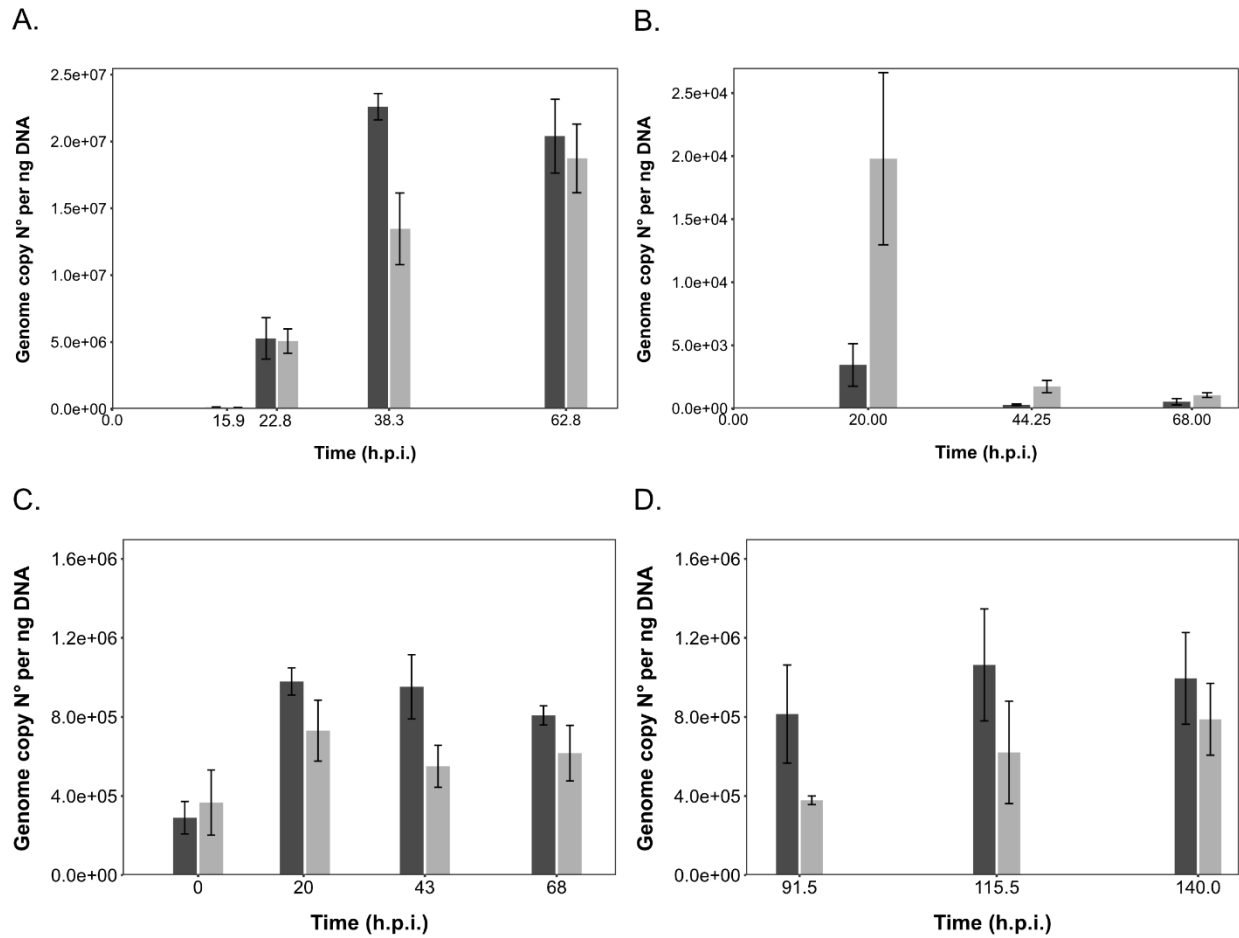

**Supplementary Figure S3: Viral and plasmid genome copy numbers in cell pellets for the three infectious agents.**

Viral or plasmid gcns per ng of DNA within cells upon infection with HRTV-DL1 **(A)** (Figure 3), HFPV-1 **(B)** (Figure 4), initial **(C)** and extended infection **(D)** with plasmid pR1SE (Figure 5). Bars represent the average of three biological replicates  $\pm$  standard deviation of the mean for the parental strain (dark grey) and the  $\Delta ag/B$  mutant (light grey).

## Supplementary Tables

**Supplementary Table S1:** Primers (PCR and qPCR) used in this study. Nucleotides in lowercase correspond to the exon-flanking regions of the *Hlac\_1062 (aglB)* gene.

| Name               | Target                                                                                                                           | Sequence 5' -> 3'                                   | qPCR conditions: Annealing temperature, primer concentration |
|--------------------|----------------------------------------------------------------------------------------------------------------------------------|-----------------------------------------------------|--------------------------------------------------------------|
| Hlac_1062-up FW    | <i>Hrr. lacusprofundi</i><br><i>Hlac_1062 (aglB)</i><br>upstream fragment, including <i>EcoRI</i> restriction site (forward)     | CTAGTGGATCCCCCGGGCTGCAGGAATTCcgaatccgcatgctgcacg    | Not applicable                                               |
| Hlac_1062-up REV   | <i>Hrr. lacusprofundi</i><br><i>Hlac_1062 (aglB)</i><br>upstream fragment (reverse)                                              | gatcaggcggcgggcggggaTCAGGCGCTCAttacgtgaagacgactgtc  | Not applicable                                               |
| Hlac_1062-down FW  | <i>Hrr. lacusprofundi</i><br><i>Hlac_1062 (aglB)</i><br>downstream fragment (forward)                                            | gttttgacagtctcttcacgtaATGAGCGCCTGatccgccccgcc       | Not applicable                                               |
| Hlac_1062-down REV | <i>Hrr. lacusprofundi</i><br><i>Hlac_1062 (aglB)</i><br>downstream fragment, including <i>HindIII</i> restriction site (reverse) | CCCCTCGAGGTGACGGTATCGATAAGCTTggaccggcggcgagctcgaaag | Not applicable                                               |
| Hlac_1062 KO FW    | PCR screening primer for <i>Hrr. lacusprofundi</i><br><i>Hlac_1062</i> (forward)                                                 | CGAATCCGCGATGCGTCACG                                | Not applicable                                               |
| Hlac_1062-2 FW     | PCR screening primer for <i>Hrr. lacusprofundi</i><br><i>Hlac_1062</i> (forward)                                                 | CGTTCCGACGACGCGAACC                                 | Not applicable                                               |
| Hlac_1062 KO REV   | PCR screening primer for <i>Hrr. lacusprofundi</i><br><i>Hlac_1062</i> (reverse)                                                 | GAGCTCGAAAGCGCCGTCG                                 | Not applicable                                               |

|               |                                                                           |                         |                |
|---------------|---------------------------------------------------------------------------|-------------------------|----------------|
| 16S rRNA FW   | <i>Hrr. lacusprofundi</i> 16S rRNA for quantification (forward)           | CGTGGCGAATAGCTCAGTAA    |                |
| 16S rRNA REV  | <i>Hrr. lacusprofundi</i> 16S rRNA for quantification (reverse)           | TTCCAGGTGGATTGTGGTATG   |                |
| Hlac_1062 FW  | <i>Hrr. lacusprofundi</i> Hlac_1062 for quantification (forward)          | CATCATGGAGAACTACCCGAATC |                |
| Hlac_1062 REV | <i>Hrr. lacusprofundi</i> Hlac_1062 for quantification (reverse)          | CATGATGTGGTCCCAGAGTG    |                |
| TyrVUF        | HFPV-1 infection detection                                                | ACGAACGAGAACACCGACC     | Not applicable |
| TyrVUR        | HFPV-1 infection detection                                                | TGATGACGAATCCAACGAGCAG  | Not applicable |
| FVP3          | VP3 of HFPV-1 for quantification (forward)                                | TTGCGTACGCGGTATCTGTC    | 68 °C, 0.13 µM |
| RVP3          | VP3 of HFPV-1 for quantification (reverse)                                | AGCTTCTCCGCATCGTCTTT    | 68 °C, 0.13 µM |
| qPMC2 F       | CH1 of all <i>Hrr. lacusprofundi</i> strains for quantification (forward) | GAGTTAGTGAAGTATCTTCG    | 61 °C, 0.15 µM |
| qPMC2 R       | CH1 of all <i>Hrr. lacusprofundi</i> strains for quantification (reverse) | GCTCTACATCCTCATAATAC    | 61 °C, 0.15 µM |
| HRTV-DLF      | HRTV-DL1 genome test for infection (forward)                              | CTAACAGCACGCCAAGAGGA    | Not applicable |
| HRTV-DLR      | HRTV-DL1 genome test for infection (reverse)                              | CACCACTGGTTTGCTTTCCG    | Not applicable |
| BV37VPF       | HRTV-DL1 genome for quantification (forward)                              | CACGCTCTCGGAAGCAAACC    | 71 °C, 0.2 µM  |
| BV37VPR       | HRTV-DL1 genome for quantification (reverse)                              | CTCGGAGTCGCCATACTGGG    | 71 °C, 0.2 µM  |

|            |                                               |                         |                  |
|------------|-----------------------------------------------|-------------------------|------------------|
| ORF6_seq1F | ORF6 of pR1SE to test for infection (forward) | CAATCATTTTCTGATTCGGAAGC | Not applicable   |
| ORF6_seq1R | ORF6 of pR1SE to test for infection (reverse) | GAGGGTTGTGAGTCGTTGTAG   | Not applicable   |
| qORF6F     | ORF6 of pR1SE for quantification (forward)    | ATCGACGACGCAGCCAACAC    | 67.8 °C,0.125 µM |
| qORF6R     | ORF6 of pR1SE for quantification (reverse)    | GTGATTGCGTCCGGGTTGAG    | 67.8 °C,0.125 µM |
